# Supplementary material for: Genome-Wide Association Study on Reproduction-Related Body-Shape Traits of Chinese Holstein Cows
Source: MDPI journal article supplement (doi:10.3390/ani11071927), 2021-06-28
Supplement: s1 [file s1]

**Table S3.** Candidate genes within 200 Kb from the significant SNPs identified in the genome-wide association studies for LS, RA, and PW

| Traits       | SNPs         | Genes        | Entrezid  | CHR                 | Location            |                     |
|--------------|--------------|--------------|-----------|---------------------|---------------------|---------------------|
| LS           | rs42946768   | CDH12        | 540672    | 20                  | 51192127-51567420   |                     |
|              | rs109073659  | PCDH9        | 509935    | 12                  | 39460262-40603455   |                     |
|              | rs133475777  | DTHD1        | 100140203 | 6                   | 55682987-55761611   |                     |
|              |              | ARAP2        | 512010    | 6                   | 55443414-55641572   |                     |
|              |              | LOC112447062 | 112447062 | 6                   | 55676300-55680617   |                     |
|              |              | DTHD1        | 100140203 | 6                   | 55682987-55761611   |                     |
|              |              | LOC104972734 | 104972734 | 6                   | 55963434-56027535   |                     |
|              | rs43162548   | TARP         | 100335800 | 4                   | 50141812-50162835   |                     |
|              |              | LOC112446379 | 112446379 | 4                   | 50123266-50126142   |                     |
|              |              | LOC112446378 | 112446378 | 4                   | 50142032-50148466   |                     |
|              |              | CTTNBP2      | 530341    | 4                   | 50482582-50651615   |                     |
|              | RA           | rs43486059   | LOC781835 | 781835              | 6                   | 102563753-102607151 |
|              |              |              | HSD17B13  | 618192              | 6                   | 102192495-102212283 |
|              |              |              | HSD17B11  | 527592              | 6                   | 102227494-102276972 |
| NUDT9        |              |              | 517589    | 6                   | 102320425-102357772 |                     |
| SPARCL1      |              |              | 507537    | 6                   | 102370630-102423199 |                     |
| LOC104968931 |              |              | 104968931 | 6                   | 102435304-102453699 |                     |
| DSPP         |              |              | 100337125 | 6                   | 102495020-102501526 |                     |
| DMP1         |              |              | 281118    | 6                   | 102526308-102543091 |                     |
| LOC523503    |              |              | 523503    | 6                   | 102631253-102676741 |                     |
| PPP2R2C      |              |              | 782110    | 6                   | 102716696-102883585 |                     |
| WFS1         |              | 100298456    | 6         | 102896920-102928905 |                     |                     |
| rs137244035  |              | LOC112447415 | 112447415 | 7                   | 45062806-45065666   |                     |
|              |              | LOC112447416 | 112447416 | 7                   | 45263769-45274033   |                     |
| rs43366267   |              | SH3BP4       | 520462    | 3                   | 114535121-114633955 |                     |
|              |              | LOC112445894 | 112445894 | 3                   | 114482144-114490858 |                     |
|              |              | LOC112446038 | 112446038 | 3                   | 115011161-115024686 |                     |
|              |              | AGAP1        | 522241    | 3                   | 115044734-115605268 |                     |
| rs43352090   |              | ATG4C        | 531455    | 3                   | 82756137-82888314   |                     |
|              |              | ITGB3BP      | 614469    | 3                   | 82052235-82157908   |                     |
|              | ALG6         | 510138       | 3         | 82149562-82208246   |                     |                     |
|              | FOXD3        | 532383       | 3         | 82243110-82245982   |                     |                     |
|              | LOC101906485 | 101906485    | 3         | 82246130-82248189   |                     |                     |
|              | LOC112446160 | 112446160    | 3         | 82787128-82787234   |                     |                     |
| PW           | rs109578471  | USP6NL       | 530462    | 13                  | 12568065-12779550   |                     |
|              |              | UPF2         | 781181    | 13                  | 12301048-12396488   |                     |
|              |              | LOC101907256 | 101907256 | 13                  | 12402359-12403416   |                     |
|              |              | PROSER2      | 781700    | 13                  | 12436965-12492165   |                     |
|              |              | ECHDC3       | 617368    | 13                  | 12494254-12533520   |                     |
|              |              | LOC112449248 | 112449248 | 13                  | 12766847-12771138   |                     |

|            |              |           |    |                   |
|------------|--------------|-----------|----|-------------------|
|            | LOC104973708 | 104973708 | 13 | 12788585-12799155 |
|            | LOC112449249 | 112449249 | 13 | 12803905-12808553 |
|            | CELF2        | 777790    | 13 | 12976707-13184863 |
| rs43430205 | CNTN3        | 526697    | 22 | 27019078-27418487 |
| rs42051017 | LOC101907665 | 101907665 | 29 | 3661815-3683578   |

Note: LS: Loin Strength; PS: Pin Setting; PW: Rump Angle; CHR: Chromosome
