# Supplementary material for: Genome-Wide Association Study on Reproduction-Related Body-Shape Traits of Chinese Holstein Cows
Source: MDPI journal article supplement (doi:10.3390/ani11071927), 2021-06-28
Supplement: s1 [file s1]

**Table S2.** Phenotypic and genetic correlations between LS, RA and PW of cows

| <b>Trait</b> | <b>LS</b>    | <b>RA</b>   | <b>PW</b> |
|--------------|--------------|-------------|-----------|
| LS           |              | -0.06       | -0.14     |
| RA           | 0.36 (0.17)  |             | 0.13      |
| PW           | -0.08 (0.03) | 0.27 (0.08) |           |

Note: LS: Loin Strength; PS: Pin Setting; PW: Rump Angle. Above the diagonal are phenotypic correlations, below the diagonal are genetic correlations and in parentheses are standard errors about genetic correlations.
